# Supplementary material
Source: publisher figshare collection journal article supplement (https://asha.figshare.com/articles/dataset/_/14984511)
Supplement: Supplementary file [file 1]

**Supplemental Material S3.** Multiple regression models predicting mean RT and RT difference scores for participants with impaired and unimpaired working memory.

|                                                       | Unimpaired                                             |       |      | Impaired                                                |       |      |
|-------------------------------------------------------|--------------------------------------------------------|-------|------|---------------------------------------------------------|-------|------|
| <b>Mean RT: Sentences in Multispeakers</b>            | Overall model:<br>$F(4, 6) = 5.48, p = .16, R^2 = .92$ |       |      | Overall model:<br>$F(4, 8) = 1.18, p = .39, R^2 = .37$  |       |      |
| Predictors                                            | $\beta$                                                | $t$   | $p$  | $\beta$                                                 | $t$   | $p$  |
| Age                                                   | 0.17                                                   | 0.72  | .60  | 0.55                                                    | 0.99  | .35  |
| Hearing Status                                        | 0.48                                                   | 1.71  | .23  | 0.06                                                    | 0.11  | .92  |
| Working Memory                                        | -1.21                                                  | -4.36 | .049 | -0.38                                                   | -1.29 | .24  |
| Attentional Control                                   | 0.40                                                   | 1.63  | .25  | 0.22                                                    | 0.73  | .49  |
| <b>Mean RT: Sentences in Broadband Noise</b>          | Overall model:<br>$F(4, 6) = 3.42, p = .24, R^2 = .87$ |       |      | Overall model:<br>$F(4, 8) = 1.43, p = .31, R^2 = .42$  |       |      |
| Predictors                                            | $\beta$                                                | $t$   | $p$  | $\beta$                                                 | $t$   | $p$  |
| Age                                                   | 0.13                                                   | 0.44  | .71  | 0.47                                                    | 0.88  | .41  |
| Hearing Status                                        | 0.55                                                   | 1.57  | .26  | 0.10                                                    | 0.19  | .86  |
| Working Memory                                        | -1.23                                                  | -3.61 | .07  | -0.29                                                   | -1.02 | .34  |
| Attentional Control                                   | 0.03                                                   | 0.11  | .93  | -0.26                                                   | -0.88 | .41  |
| <b>Mean RT: Sentences in Silence</b>                  | Overall model:<br>$F(4, 6) = 7.95, p = .12, R^2 = .94$ |       |      | Overall model:<br>$F(4, 8) = 0.79, p = .56, R^2 = .28$  |       |      |
| Predictors                                            | $\beta$                                                | $t$   | $p$  | $\beta$                                                 | $t$   | $p$  |
| Age                                                   | 0.25                                                   | 1.22  | .35  | 0.39                                                    | 0.66  | .53  |
| Hearing Status                                        | 0.73                                                   | 3.07  | .09  | 0.19                                                    | 0.32  | .76  |
| Working Memory                                        | -1.14                                                  | -4.90 | .04  | -0.19                                                   | -0.59 | .57  |
| Attentional Control                                   | -0.49                                                  | -2.58 | .12  | 0.18                                                    | 0.55  | .60  |
| <b>RT Difference: Effect of Informational Masking</b> | Overall model:<br>$F(4, 6) = 2.98, p = .27, R^2 = .86$ |       |      | Overall model:<br>$F(4, 8) = 2.89, p = .09, R^2 = .59$  |       |      |
| Predictors                                            | $\beta$                                                | $t$   | $p$  | $\beta$                                                 | $t$   | $p$  |
| Age                                                   | -0.04                                                  | -0.13 | .91  | 0.08                                                    | 0.19  | .86  |
| Hearing Status                                        | -0.35                                                  | -0.95 | .44  | 0.02                                                    | 0.04  | .97  |
| Working Memory                                        | 0.50                                                   | 1.37  | .31  | -0.12                                                   | -0.48 | .65  |
| Attentional Control                                   | 0.84                                                   | 2.85  | .10  | 0.78                                                    | 3.16  | .01  |
| <b>RT Difference: Effect of Energetic Masking</b>     | Overall model:<br>$F(4, 6) = 0.69, p = .66, R^2 = .58$ |       |      | Overall model†:<br>$F(4, 8) = 8.91, p < .01, R^2 = .82$ |       |      |
| Predictors                                            | $\beta$                                                | $t$   | $p$  | $\beta$                                                 | $t$   | $p$  |
| Age                                                   | -0.34                                                  | -0.62 | .60  | -0.42                                                   | -1.41 | .20  |
| Hearing Status                                        | -0.36                                                  | -0.57 | .63  | 0.34                                                    | 1.13  | .29  |
| Working Memory                                        | 0.28                                                   | 0.46  | .69  | -0.04                                                   | -0.25 | .81  |
| Attentional Control                                   | 0.80                                                   | 1.58  | .26  | -0.81                                                   | -4.85 | .001 |

†Model is not significant with attentional control outlier removed
