# Supplementary material
Source: publisher figshare collection journal article supplement (https://asha.figshare.com/articles/dataset/_/14984511)
Supplement: Supplementary file [file 1]

**Supplemental Material S1.** Individual participant data.

| <b>Participant</b> | <b>Number of trials in analysis (# excluded due to inaccuracy, due to RT outlier)</b> |                        |                |
|--------------------|---------------------------------------------------------------------------------------|------------------------|----------------|
|                    | <b>Multispeakers</b>                                                                  | <b>Broadband Noise</b> | <b>Silence</b> |
| PWS 1              | 10 (0, 0)                                                                             | 10 (0, 0)              | 10 (0, 0)      |
| PWS 2              | 9 (1, 0)                                                                              | 10 (0, 0)              | 10 (0, 0)      |
| PWS 3              | 6 (4, 0)                                                                              | 8 (1, 1)               | 8 (2, 0)       |
| PWS 4              | 8 (1, 1)                                                                              | 9 (1, 0)               | 7 (2, 1)       |
| PWS 5              | 10 (0, 0)                                                                             | 10 (0, 0)              | 10 (0, 0)      |
| PWS 6              | 10 (0, 0)                                                                             | 9 (1, 0)               | 10 (0, 0)      |
| PWS 7              | 10 (0, 0)                                                                             | 10 (0, 0)              | 10 (0, 0)      |
| PWS 8              | 8 (2, 0)                                                                              | 9 (1, 0)               | 9 (0, 1)       |
| PWS 9              | 3 (7, 0)                                                                              | 5 (5, 0)               | 7 (3, 0)       |
| PWS 10             | 10 (0, 0)                                                                             | 10 (0, 0)              | 10 (0, 0)      |
| PWS 11             | 10 (0, 0)                                                                             | 10 (0, 0)              | 9 (1, 0)       |
| PWS 12             | 10 (0, 0)                                                                             | 9 (0, 1)               | 10 (0, 0)      |
| PWS 13*            | 5 (0, 0)                                                                              | 5 (0, 0)               | 5 (0, 0)       |
| PWS 14             | 10 (0, 0)                                                                             | 10 (0, 0)              | 9 (1, 0)       |
| PWS 15             | 10 (0, 0)                                                                             | 9 (1, 0)               | 9 (0, 1)       |
| PWS 16             | 10 (0, 0)                                                                             | 9 (1, 0)               | 10 (0, 0)      |
| PWS 17             | 8 (2, 0)                                                                              | 4 (6, 0)               | 8 (1, 1)       |
| PWS 18             | 10 (0, 0)                                                                             | 10 (0, 0)              | 10 (0, 0)      |
| PWS 19             | 9 (1, 0)                                                                              | 10 (0, 0)              | 9 (1, 0)       |
| PWS 20             | 5 (5, 0)                                                                              | 7 (3, 0)               | 7 (3, 0)       |

\*Data collection error resulting in 15 total trials instead of the normal 30 total trials.
